# Supplementary material for: Vaspin promotes chondrogenic differentiation of BMSCs via Akt activation in osteoarthritis
Source: PubMed Central journal article supplement (PMC8996515; doi:10.1186/s12891-022-05295-9), 2022-04-11
Supplement: 12891_2022_5295_MOESM1_ESM.pdf [file 12891_2022_5295_MOESM1_ESM.pdf]

**Supplementary Figure 1.** The immunohistochemical staining results.

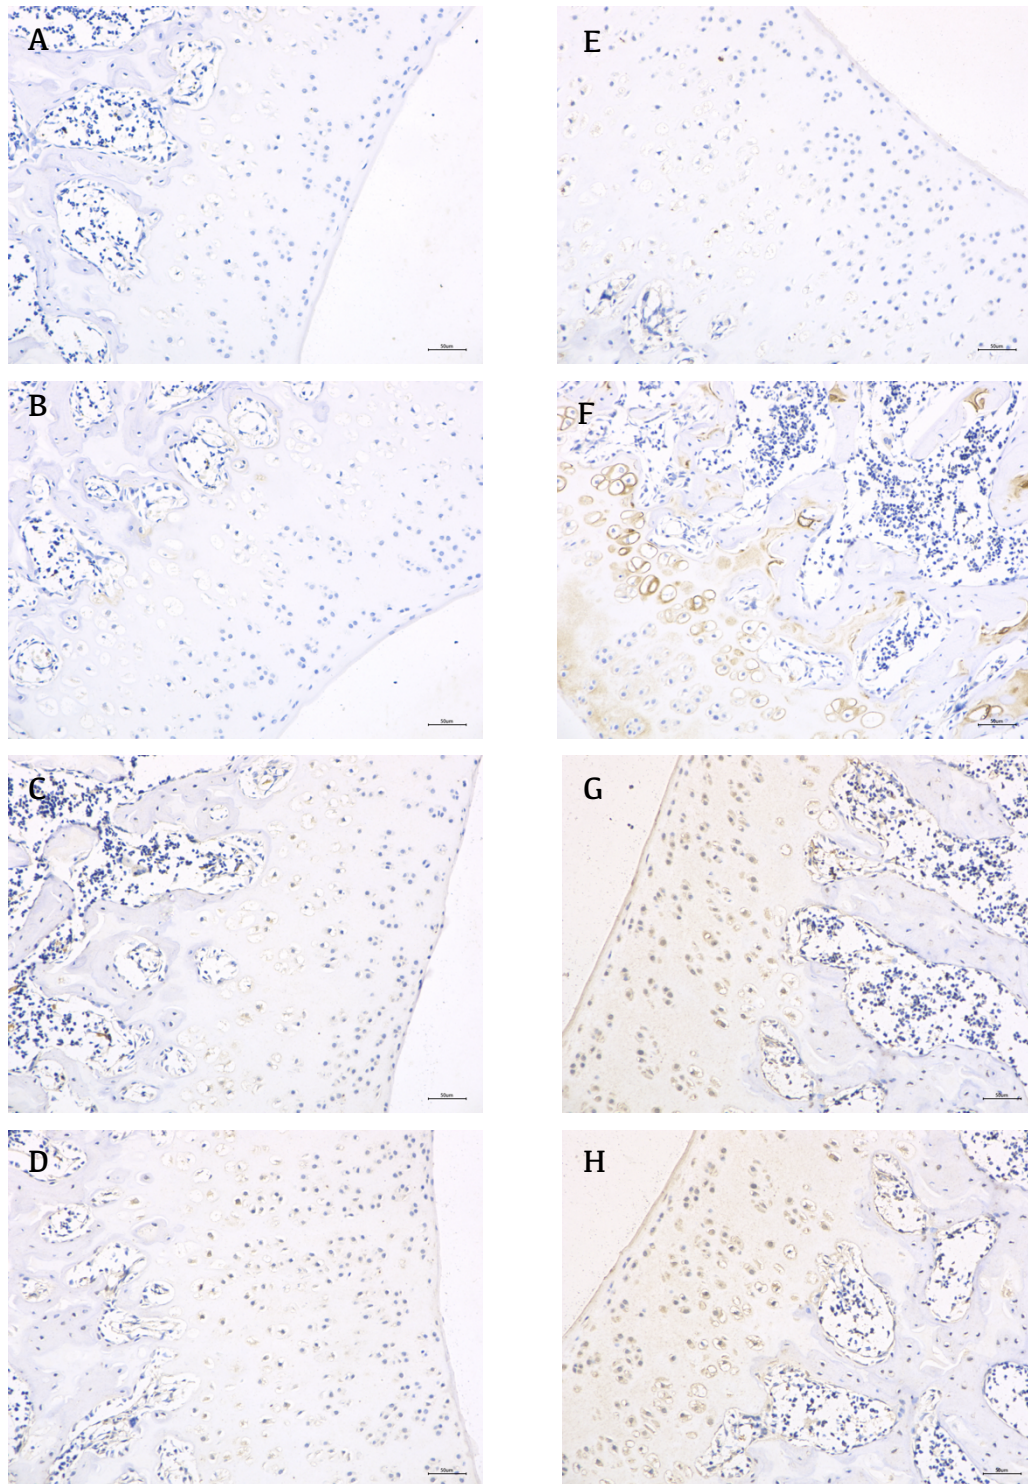

The protein expressions of Akt in Wistar rat articular cartilage and subchondral bone in Sham group (A-D) and Vaspin group (E-H).
