# Supplementary material for: Vaspin promotes chondrogenic differentiation of BMSCs via Akt activation in osteoarthritis
Source: PubMed Central journal article supplement (PMC8996515; doi:10.1186/s12891-022-05295-9), 2022-04-11
Supplement: 12891_2022_5295_MOESM2_ESM.pdf [file 12891_2022_5295_MOESM2_ESM.pdf]

**Supplementary Figure 2.** The original blots in western blotting.

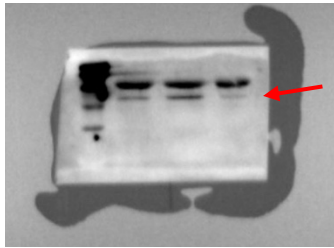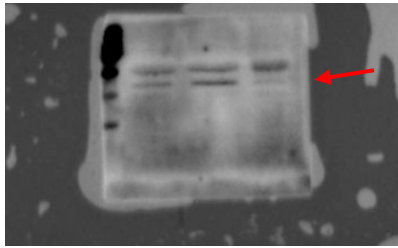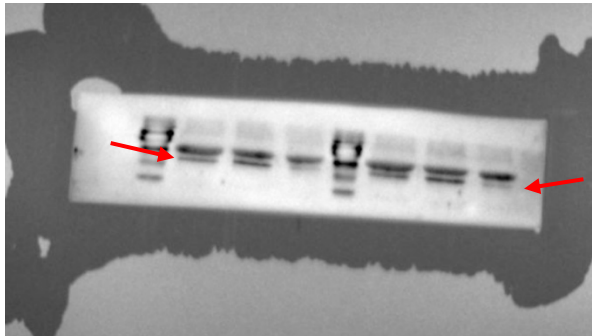

Above are the original blots of COMP.

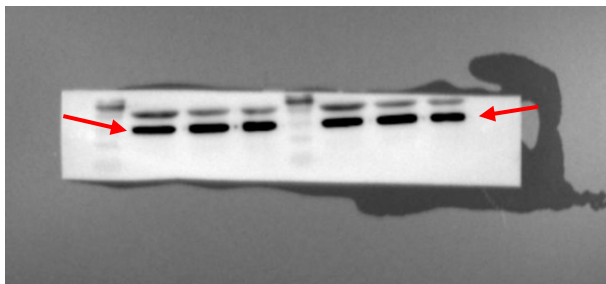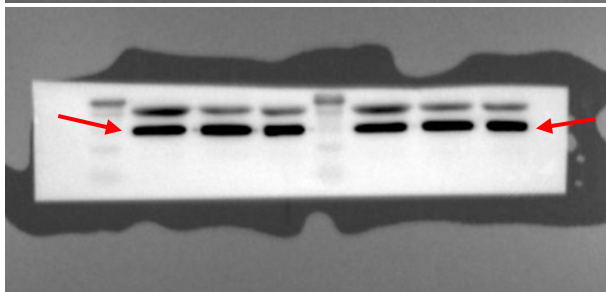

Above are the original blots of  $\beta$ -Actin.
